# Supplementary material for: A Transposon-Associated CRISPR/Cas9 System Specifically Eliminates both Chromosomal and Plasmid-Borne mcr-1 in Escherichia coli
Source: PubMed Central journal article supplement (PMC8448152; doi:10.1128/aac.01054-21), 2021-09-17
Supplement: aac.01054-21-s0001.pdf [file aac.01054-21-s0001.pdf]

a

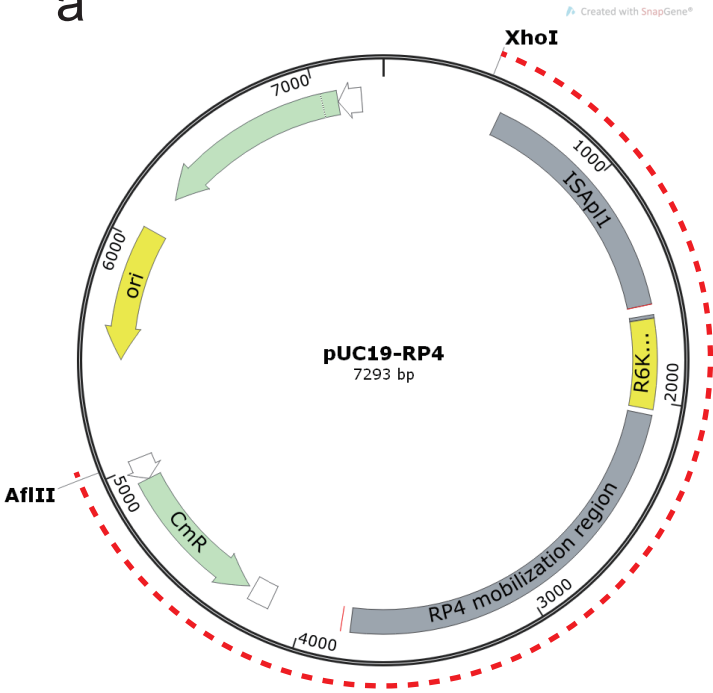

b

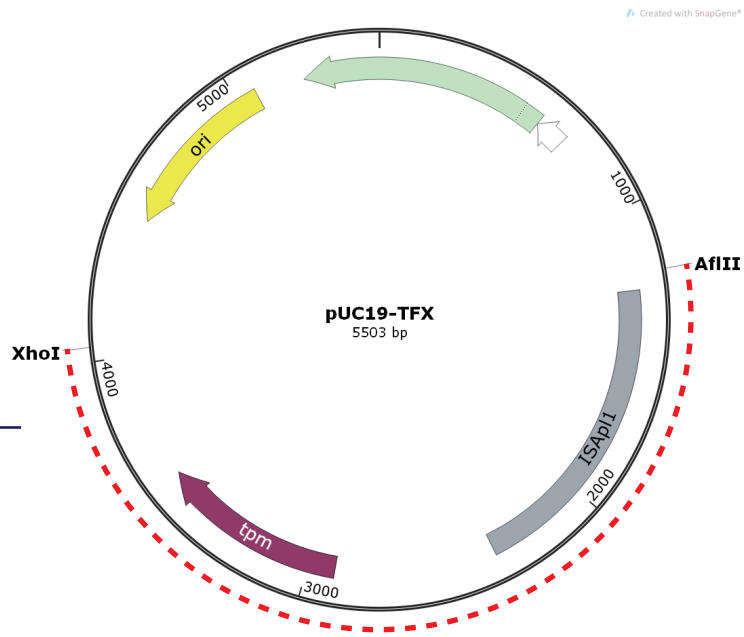

Both plasmids were digested with *AflIII* and *XhoI*

Ligate

c

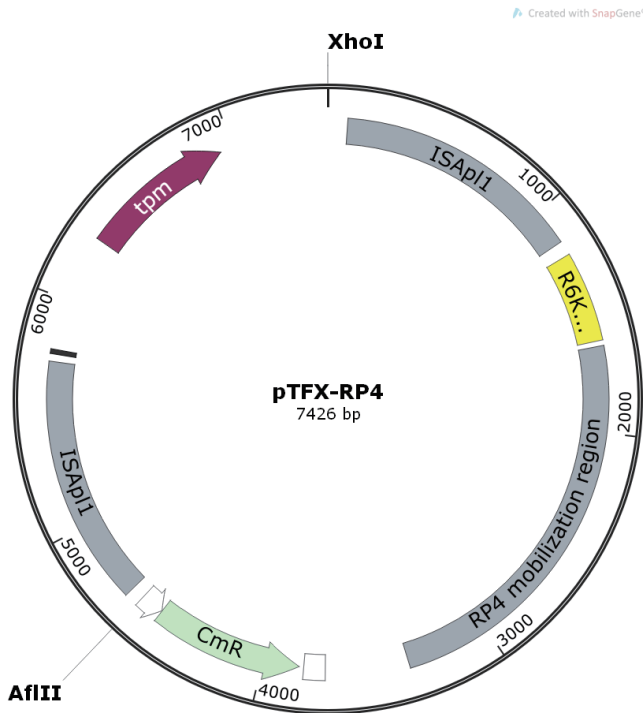

a

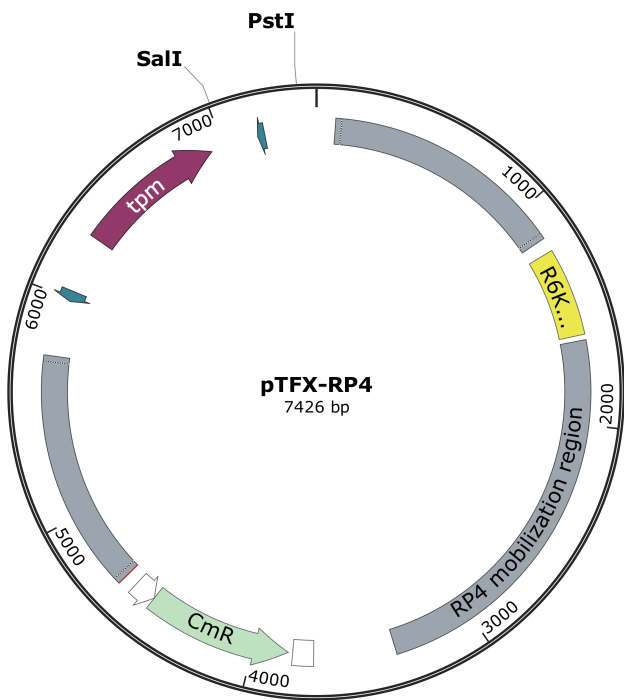

b

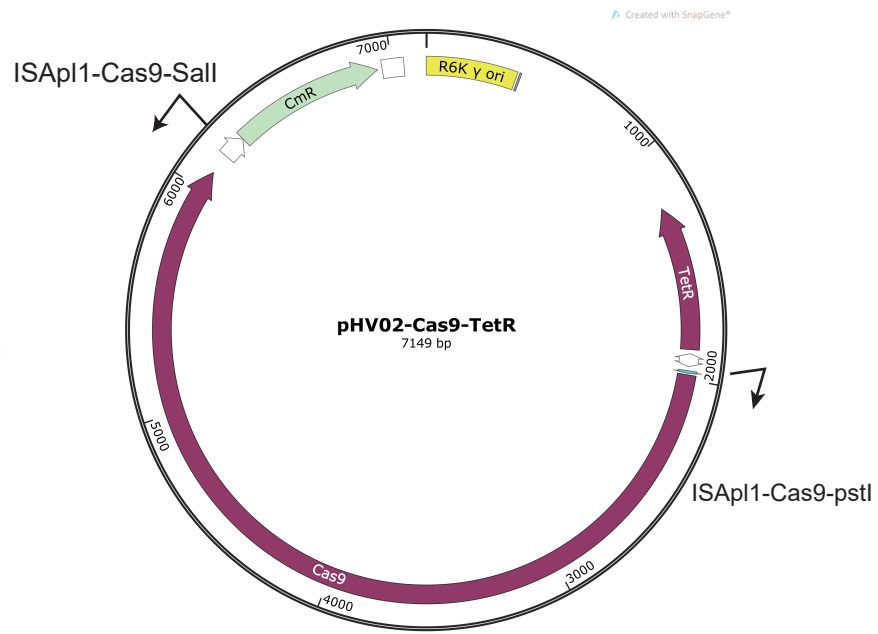

digested with *Sall* and *PstI*

PCR amplified and digested with *Sall* and *PstI*

Ligated

c

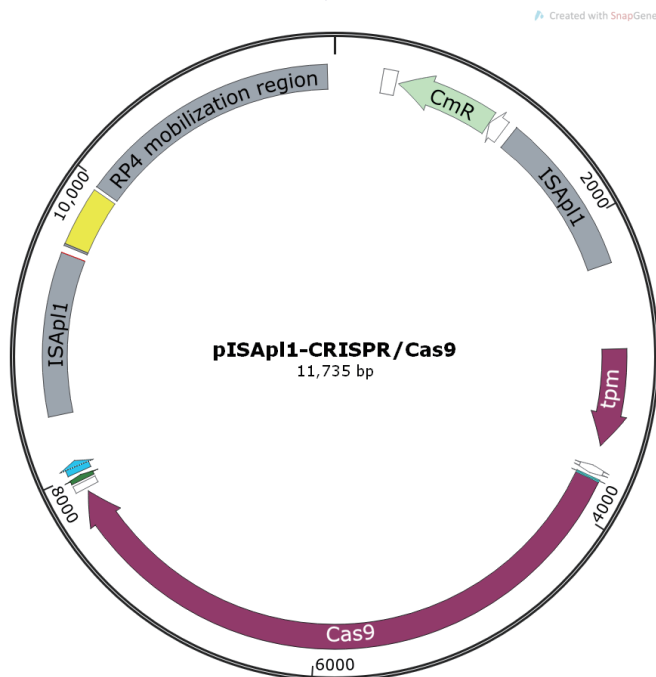

**a**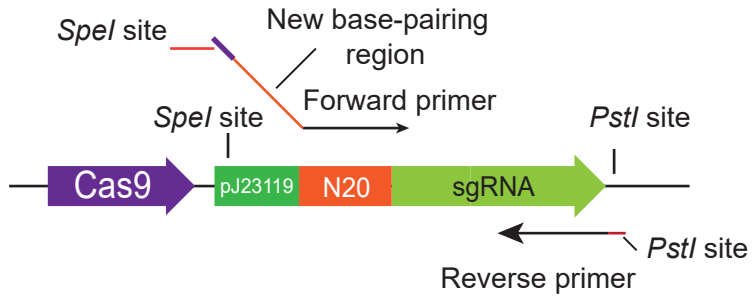**b**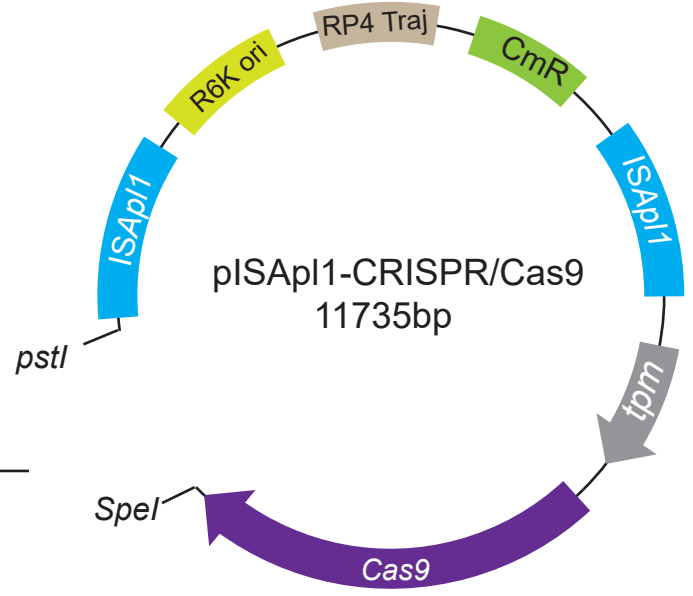

*PstI*+ *SpeI* digestion  
and followed by ligation

**c**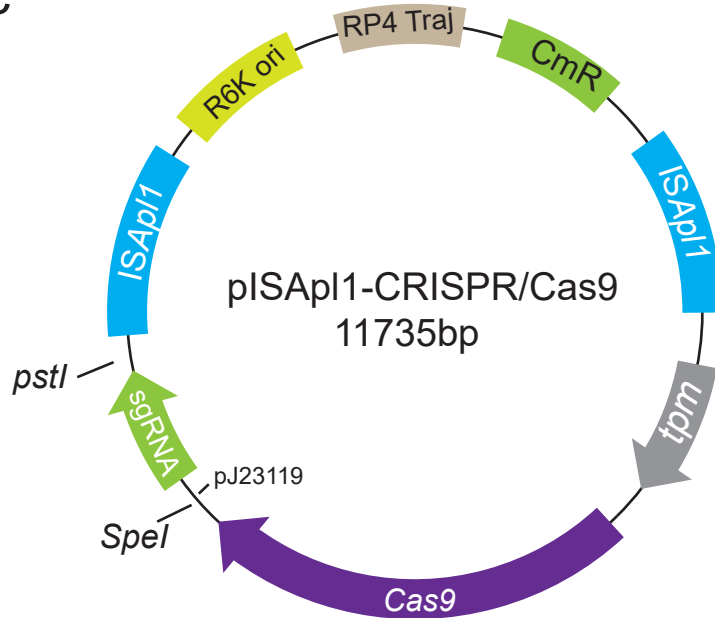

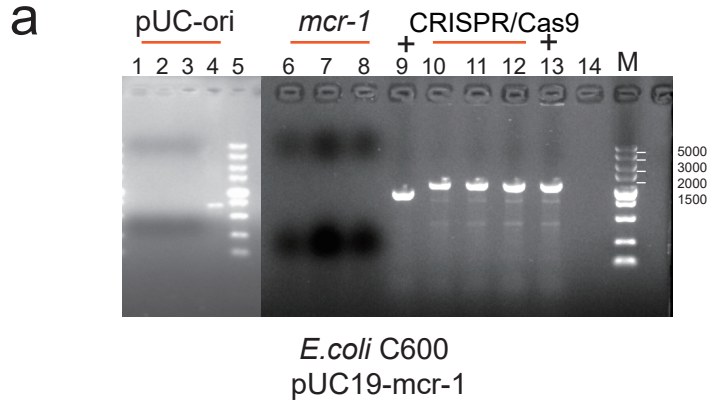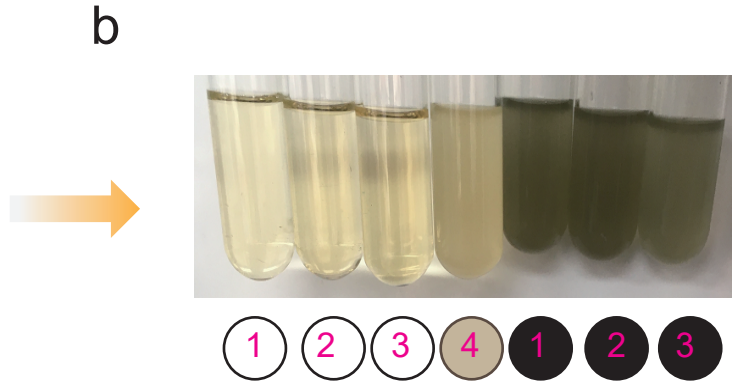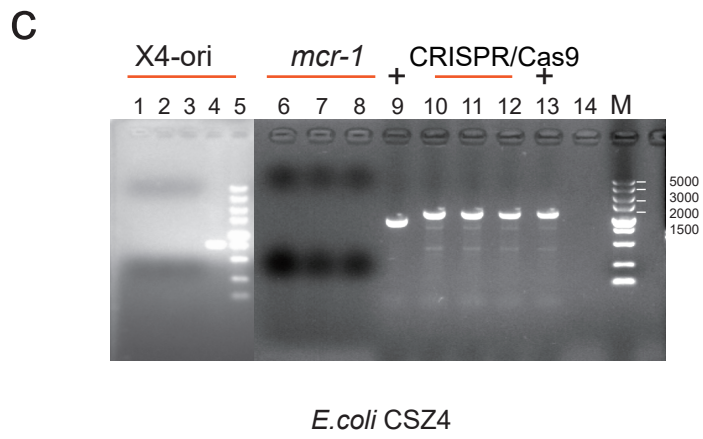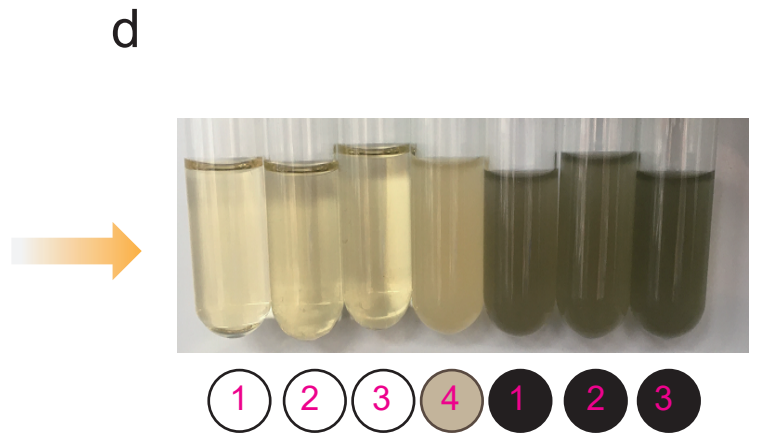



### Supplementary materials

**Table S1;** Primers used in this study

| Primers           | Sequences (5'-3')                                                         | References |
|-------------------|---------------------------------------------------------------------------|------------|
| RP4-F             | GGTGAGAATCCAAGCACTAGCTATCGCTACGTGACTGGGT                                  | This study |
| RP4-R             | CCATGTCAGCCGTTAAGTGT                                                      | This study |
| IS-F1             | AGCTCGGTACCCGGGGATCCTACGCCTCGAGTGGTGTGCGATGATGCTTGCG                      | This study |
| IS-R1             | CTTTCGCTAAGGATGATTTTCGGCCTAGGCGGCCACACCATAATGCCAGTTCC                     | This study |
| CmR-F             | CCAAGCTTGCATGCCTGCAGTACGCCTTAAGTGATCGGCACGTAAGAGGTT                       | This study |
| CmR-R             | CTAGTGCTTGGATTCTCACC                                                      | This study |
| UC19-F1           | CTGCAGGCATGCAAGCTTGG                                                      | This study |
| UC19-R1           | GGATCCCCGGGTACCGAGCTCGAATTCAGTGGCCGTCGTTTTAC                              | This study |
| TPM-HF1           | GTGTATATTCAGTATGGGATTGCG                                                  | This study |
| TPM-HR1           | CGGTGGAATCGAAATCTCGTGCCATGCATGTGCGACTCTAG                                 | This study |
| IS-F2             | CCTAGGCCTGGAGATCTACTACTGTGGCTAAGCCTCAACTTA                                | This study |
| IS-R2             | CGCAATCCCATACTGAATATACAC                                                  | This study |
| UC19-F2           | ACGAGATTTTCGATTCCACCG                                                     | This study |
| UC19-R2           | AGTAGATCTCCAGGCCTAGG                                                      | This study |
| SpeI-N20-mcr      | AATACTAGT <u>GCGGCATT</u> CGTTATAAGGATGTTTTAGAGCTAGAAATAGCAAGTTAAAATAAGGC | This study |
| SpeI-N20-IncX4    | AATACTAGT <u>AGACTCAAATTCATTGAATC</u> GTTTTAGAGCTAGAAATAGCAAGTTAAAATAAGGC | This study |
| ISApII-Cas9-sall  | TA <u>AGTCGAC</u> CGCAGCTCTAATGCGCTGTTA                                   |            |
| ISApI1-sgRNA-pstI | TAACT <u>GCAAG</u> GCAACGTTCAAATCCGCTCC                                   | This study |
| mut-Cas9F         | GCAGCTCTAATGCGCTGTTAATC                                                   | This study |

|           |                          |            |
|-----------|--------------------------|------------|
| mut-Cas9R | TGTTTTTTGCCCTGTGCGAGTA   | This study |
| mcr-TF    | GATCACCACGCTGTTATCATCG   | This study |
| mcr-TR    | CATATCTTTGCCGTTATTGGCAGC | This study |
| UC19-TF   | TTCCATAGGCTCCGCCCC       | This study |
| UC19-TR   | TTGAGATCCTTTTTTTCTGCGCG  | This study |
| IncX4-TF  | CTCTGAGTCTTCCCTGGTATCG   | This study |
| IncX4-TR  | CAACATTGCCTATGGCTGCT     | This study |

---

## Appendix 1

### The construction of pISApI1-CRISPR/Cas9

In brief, the plasmid was constructed by first generating plasmid pUC19-RP4 (**FigureS1 a**) that contained the RP4oriT conjugation transfer fragment. The R6K ori was amplified using primers RP4-F and RP4-R from pCVD442(1). A single copy of *ISApI1* was amplified from the genome of *E. coli* strain FS13Z2S (2) using primers IS-F1 and IS-F2. The chloramphenicol resistance gene CmR was amplified from pSV03(3) using primers CmR-F and CmR-R, and the backbone was amplified from pUC19 using primers UC19-F1 and UC19-R1. These four DNA fragments with homologous sequences at their ends were used to generate pUC19-RP4 by homologous recombination using the NEBuilder HiFi DNA Assembly kit (New England Biolabs, Beverley, MA, USA). Then, a synthetic cassette containing the thiopurine S-methyltransferase (*tpm*) gene driven by the *rpsL* PCS12 promoter (4) that was cloned into pKD4(5) to generate pKD4-*tpm*. The *tpm* gene was then amplified using primers TPM-HF1 and TPM-HR1. Another single copy of *ISApI1* that differed from the one contained in pUC19-RP4 was amplified from the genome of *E. coli* FS13Z2S using primers IS-F2 and IS-R2 and the plasmid backbone was amplified from pUC19 using primers UC19-F2 and UC19-R2 as above. These four DNA fragments were assembled by homologous recombination to generate pUC19-TFX (**FigureS1 b**). The pTFX-RP4 plasmid was constructed by digesting pUC19-RP4 and pUC19-TFX plasmids with *AflIII* and *XhoI* and the digested fragments (The red dotted line **FigureS1 a b**) were purified from agarose gels. The purified fragments were ligated giving rise to the recombinant plasmid pTFX-RP4 (**FigureS1 c**).

The Cas9 gene and sgRNA from pHV02-Cas9 (Laboratory stock, **Figure S2b**) were subsequently amplified with primers Cas9-Sall and Cas9-PstI as previously described. The amplicons were then digested and ligated to plasmid pTFX-RP4 at the same restriction sites, resulting in the recombinant plasmid pISApI1-CRISPR/Cas9 (**Figure S2c**).

## Figure Legends

**Figure S1;**(a) The plasmid map of the pUC19-RP4, (b) The plasmid map of the pUC19-TFX. (c)The plasmid map of the pTFX-RP4.

**Figure S2;**(a) Construction of pISAp1-CRISPR/Cas9. (a)The map of the pTFX-RP4, (b)The plasmid map of the pHV02-Cas9-TetR. (c)The plasmid map of pISAp1-CRISPR/Cas9.

**Figure S3;** The new N20 was cloned by PCR using the pISAp1-CRISPR/Cas9 as a template. The *pstI* and *SpeI* were located on the promoter and downstream of the sgRNA, respectively, to facilitate sgRNA cloning. (b)The *pstI* and *SpeI* digested pISAp1-CRISPR/Cas9 was used as a backbone to clone the new sgRNA. (c)The pISAp1-CRISPR/Cas9 with new targeted sgRNA.

**Figure S4;** PCR and Phenotypic confirmation of colistin-sensitive mutants generated from *mcr-1* as a sgRNA target in *E. coli* C600(pUC19-*mcr-1*) and *E. coli* CSZ4. (a, c) Lane1-3 was amplified using the specific primers UC19-TF, UC19-TR, and IncX4-TF, IncX4-TR to test the replication gene of the pUC19-*mcr-1* and pCSZ4 in the plasmid cured strain *E. coli* C600(pUC19-*mcr-1*), *E. coli* CSZ4, respectively. Lane 4 was the positive control. Lane 6-8 was amplified using the specific primers *mcr*-TF, *mcr*-TF to test the *mcr-1* gene of the plasmid cured strain *E. coli* C600(pUC19-*mcr-1*), *E. coli* CSZ4, respectively. Lane 9 was the positive control that the *mcr-1* gene was used as a template. Lane 10-12 was amplified using the specific primers LHCas9TF, ISAp1-F to test the ISAp1-CRISPR/Cas9 system, Lane 13 was the positive control that the pISAp1-CRISPR/Cas9 was used as a template. (b, d) phenotypic validation of the plasmid cured strain *E. coli* C600(pUC19-*mcr-1*) and *E. coli* CSZ4, respectively. ①②③represents the above mentioned Lane1-3, 6-8,10-12 PCR colonies grow in LB barth supplemented with 2µg/ml colistin and 25µg/m sodium tellurite. ④represents the parent strain *E. coli* C600(pUC19-*mcr-1*) and *E. coli* CSZ4 grow in LB barth supplemented with 2µg/ml colistin. The numbers 1-3, 6-8, and 10-12 denote three individual repeats of overnight cultures of plasmid cure strains were diluted 100-fold and used as a PCR template

## References

1. **Philippe N, Alcaraz JP, Coursange E, Geiselmann J, Schneider D.** 2004. Improvement of pCVD442, a suicide plasmid for gene allele exchange in bacteria. *Plasmid* **51**:246-255.
2. **Sun J, Li XP, Fang LX, Sun RY, He YZ, Lin J, Liao XP, Feng Y, Liu YH.** 2018. Co-occurrence of *mcr-1* in the chromosome and on an IncHI2 plasmid: persistence of colistin resistance in *Escherichia coli*. *Int J Antimicrob Agents* doi:10.1016/j.ijantimicag.2018.01.007.
3. **He Y-Z, Li X-P, Miao Y-Y, Lin J, Sun R-Y, Wang X-P, Guo Y-Y, Liao X-P, Liu Y-H, Feng Y, Sun J.** 2019. The IS*A* $\rho$ /*I*<sub>2</sub> Dimer Circular Intermediate Participates in *mcr-1* Transposition. *Frontiers in Microbiology* **10**.
4. **Trebosc V, Gartenmann S, Royet K, Manfredi P, Tötzi M, Schellhorn B, Pieren M, Tigges M, Lociuro S, Sennhenn PC, Gitzinger M, Bumann D, Kemmer C.** 2016. A novel genome editing platform for drug resistant *Acinetobacter baumannii* revealed an AdeR-unrelated tigecycline resistance mechanism. *Antimicrobial Agents and Chemotherapy* doi:10.1128/aac.01275-16:AAC.01275-01216.
5. **Datsenko KA, Wanner BL.** 2000. One-step inactivation of chromosomal genes in *Escherichia coli* K-12 using PCR products. *Proc Natl Acad Sci U S A* **97**:6640-6645.
